# Supplementary material
Source: PubMed Central journal article supplement (PMC7001506)
Supplement: EMBR-21-e48597-s001.pdf [file EMBR-21-e48597-s001.pdf]

# Arginine methylation-dependent LSD1 stability promotes invasion and metastasis of breast cancer

Jiwei Liu<sup>1</sup>, Jingxin Feng<sup>2</sup>, Lili Li<sup>3</sup>, Luyao Lin<sup>1</sup>, Jiafei Ji<sup>2</sup>, Cong Lin<sup>1</sup>, Lingxia Liu<sup>2</sup>, Na Zhang<sup>1</sup>, Dandan Duan<sup>2</sup>, Zhongwei Li<sup>1</sup>, Baiqu Huang<sup>2</sup>, Yu Zhang<sup>\*1</sup> and Jun Lu<sup>\*2</sup>

## Table of contents

|          |                                |                                                                                                             |
|----------|--------------------------------|-------------------------------------------------------------------------------------------------------------|
| Page 2   | Appendix Figure S1             | Mass spectrometric analysis of LSD1 methylation                                                             |
| Page 3   | Appendix Figure S2             | Generation and verification of antibody against LSD1 R838me2a                                               |
| Page 4   | Appendix Figure S3             | Ubiquitination and stabilization of LSD1 in MCF10A cells                                                    |
| Page 4-5 | Appendix Figure S4             | The effect of LSD1 Methylation on epithelial and mesenchymal markers                                        |
| Page 5   | Appendix Figure S5             | LSD1 R838 methylation has no impact on cell proliferation                                                   |
| Page 6-7 | Appendix Figure S6             | USP7 inhibitor attenuates LSD1-induced cell migration and invasion depending on LSD1 R838me2a               |
| Page 7   | Appendix Table S1              | Detailed ELISA data of Appendix Fig S1A                                                                     |
| Page 8   | Appendix Table S2              | Correlation between LSD1R838me2a/LSD1/CARM1 levels and histopathological data in 70 breast cancer specimens |
| Page 9   | Polyclonal antibody production |                                                                                                             |

## Appendix Figure S1

### A 68-108:ASPPG-----ETPEGR<sub>108</sub>

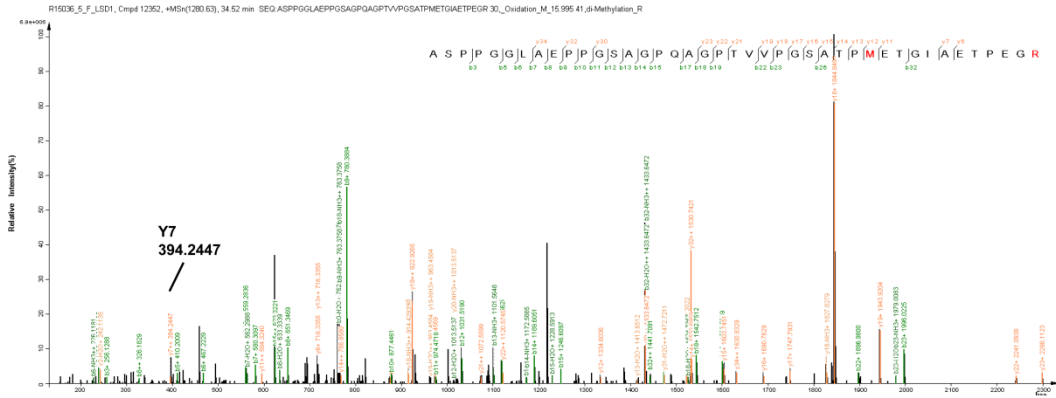

### B 595-608:YTASGCEVIAVNTR<sub>608</sub>

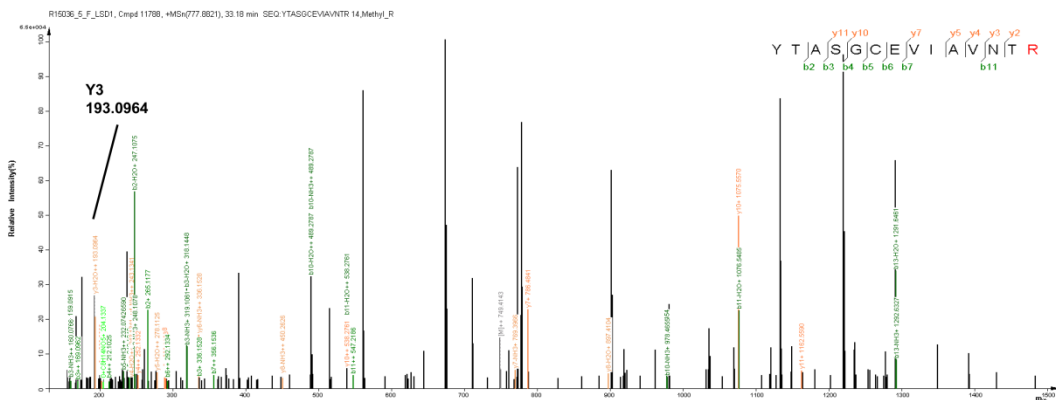

### C 700-726:APILL-----ISDDVIVGR<sub>726</sub>

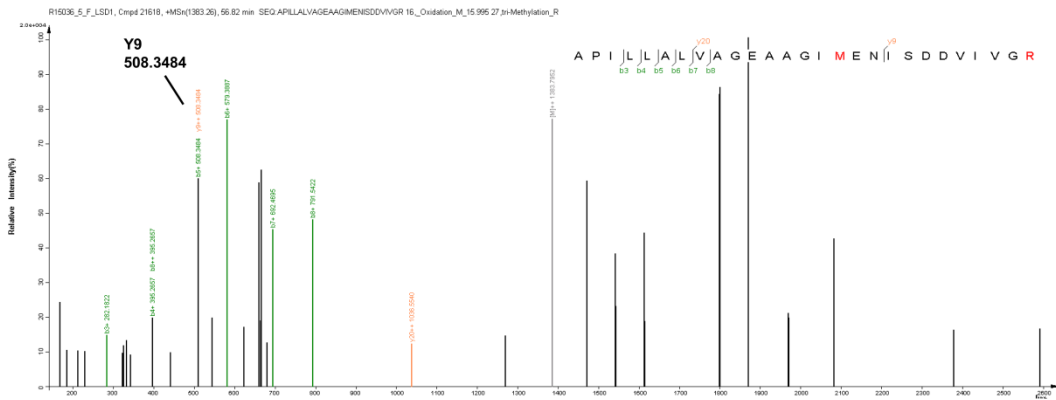

## Appendix Figure S1. Mass spectrometric analysis of LSD1 methylation.

Immunoprecipitation (IP) was performed using anti-Flag antibody in HEK-293T cells overexpressing Flag-tagged LSD1, followed by liquid chromatography coupled tandem mass spectrometry (LC-MS/MS) analysis. Methylated residue of Arg108 (**A**), Arg608 (**B**) and Arg726 (**C**) were identified.

Appendix Figure S2

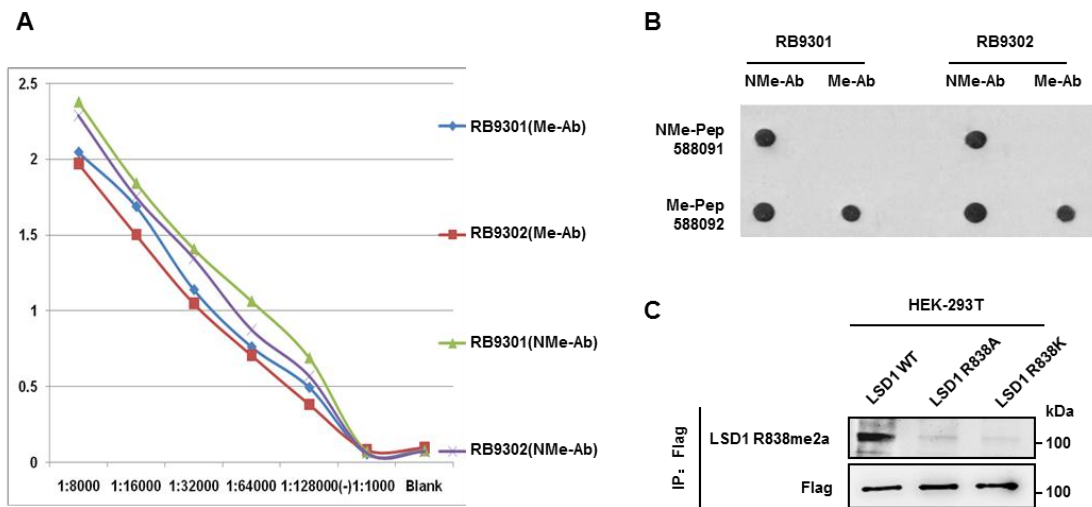

**Appendix Figure S2. Generation and verification of antibody against LSD1 R838me2a.** (A, B) The specificity of anti-LSD1R838me2a2 antibody was validated by ELISA (A) and dot blot analysis (B). Data were provided by GL Biochem Co., Ltd (Shanghai, China) (Rabbit ID: RB9301, RB9301; A, Detailed ELISA data shown in Appendix Table S1. B, NMe-Pep: Non-asymmetric dimethylation peptide; Me-Pep: Asymmetric dimethylation peptide; NMe-Ab: Non-asymmetric dimethylation-Antibody; Me-Ab: Asymmetric dimethylation Antibody; Antibody Dilution: 1:500; Peptide: 5 ng). (C) HEK-293T cells transfected with Flag-LSD1 WT or Flag-LSD1 R838A/R838K, IP assay was performed using anti-Flag antibody followed by immunoblotting with anti-LSD1 R838me2a antibody.

Appendix Figure S3

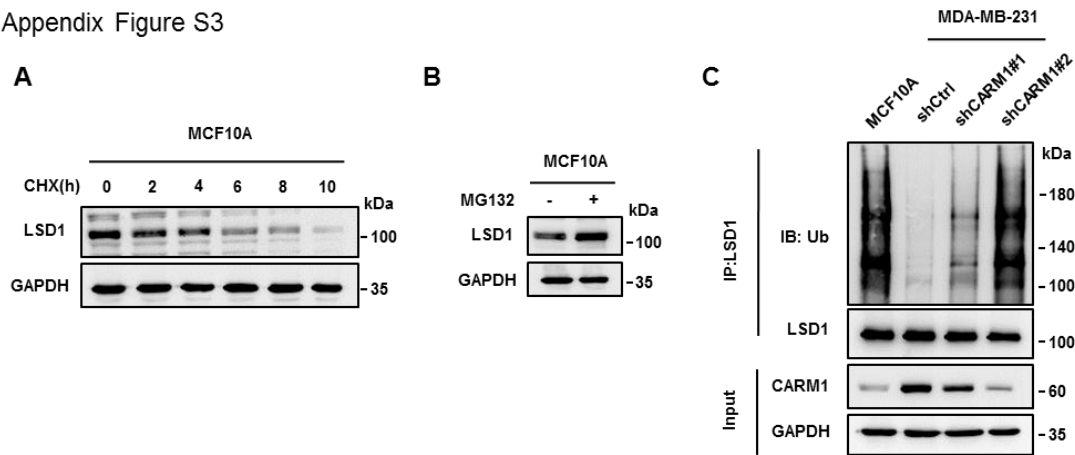

**Appendix Figure S3. Ubiquitination and stabilization of LSD1 in MCF10A cells.** (A) MCF10A cells were treated with CHX for the indicated time, and LSD1 protein level was examined by western blotting. (B) MCF10A cells were treated with MG132 for 10 h, and the cell lysates were analyzed by western blotting. (C) The LSD1 ubiquitination status of MCF10A and CARM1-knockdown MDA-MB-231 cells were assessed by immunoblotting after IP using anti-LSD1 antibody..

Appendix Figure S4

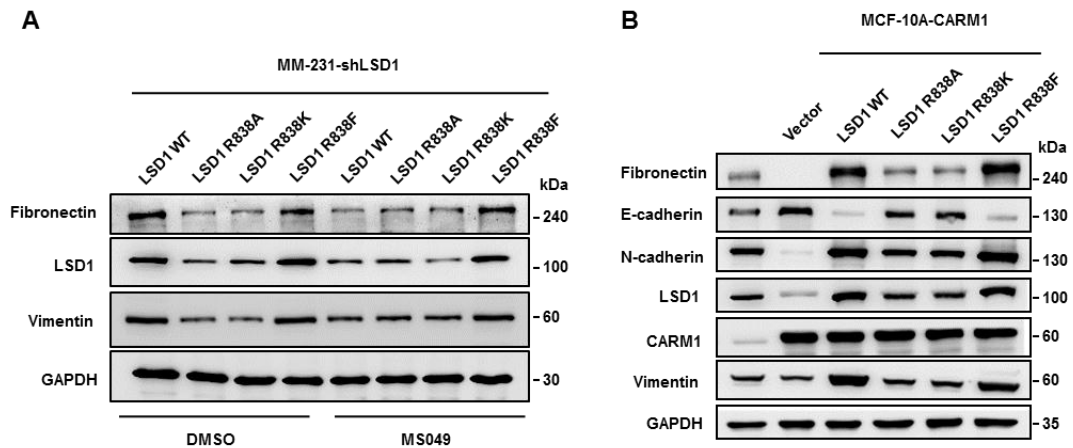

**Appendix Figure S4. The effect of LSD1 Methylation on epithelial and mesenchymal markers.** (A) MM-231-shLSD1 WT/R838A/R838K/R838F cells were treated with or without MS049. And the mesenchymal markers were analyzed by immunoblotting with indicated antibodies. (B) The epithelial and mesenchymal markers were analyzed by immunoblotting in MCF10A cells

overexpressing indicated protein(s). GAPDH was used as a protein lysate loading control.

Appendix Figure S5

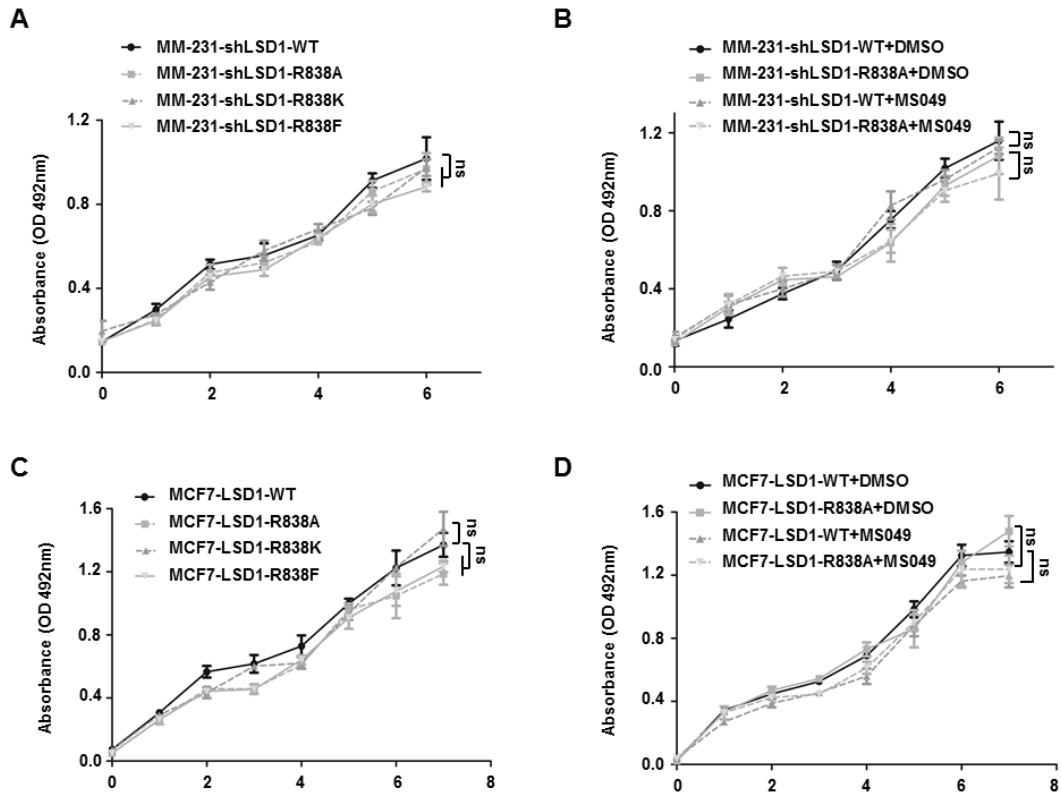

**Appendix Figure S5. LSD1 R388 methylation has no impact on cell proliferation. (A, C)** The growth rate of MM-231-shLSD1-WT/R838A/R838K/R838F cells **(A)** and MCF7-LSD1-WT/R838A/R838K/R838F cells **(C)** were measured by MTT assay. **(B, D)** The growth velocity of MDA-MB-231-shLSD1-WT/R838A cells **(B)** and MCF7-LSD1-WT/R838A cells under MS049 treatment **(D)** was assessed by MTT assays.

Data information: Data are the mean  $\pm$  SD of five replicates per experiment, ns = not significant, t-test.

Appendix Figure S6

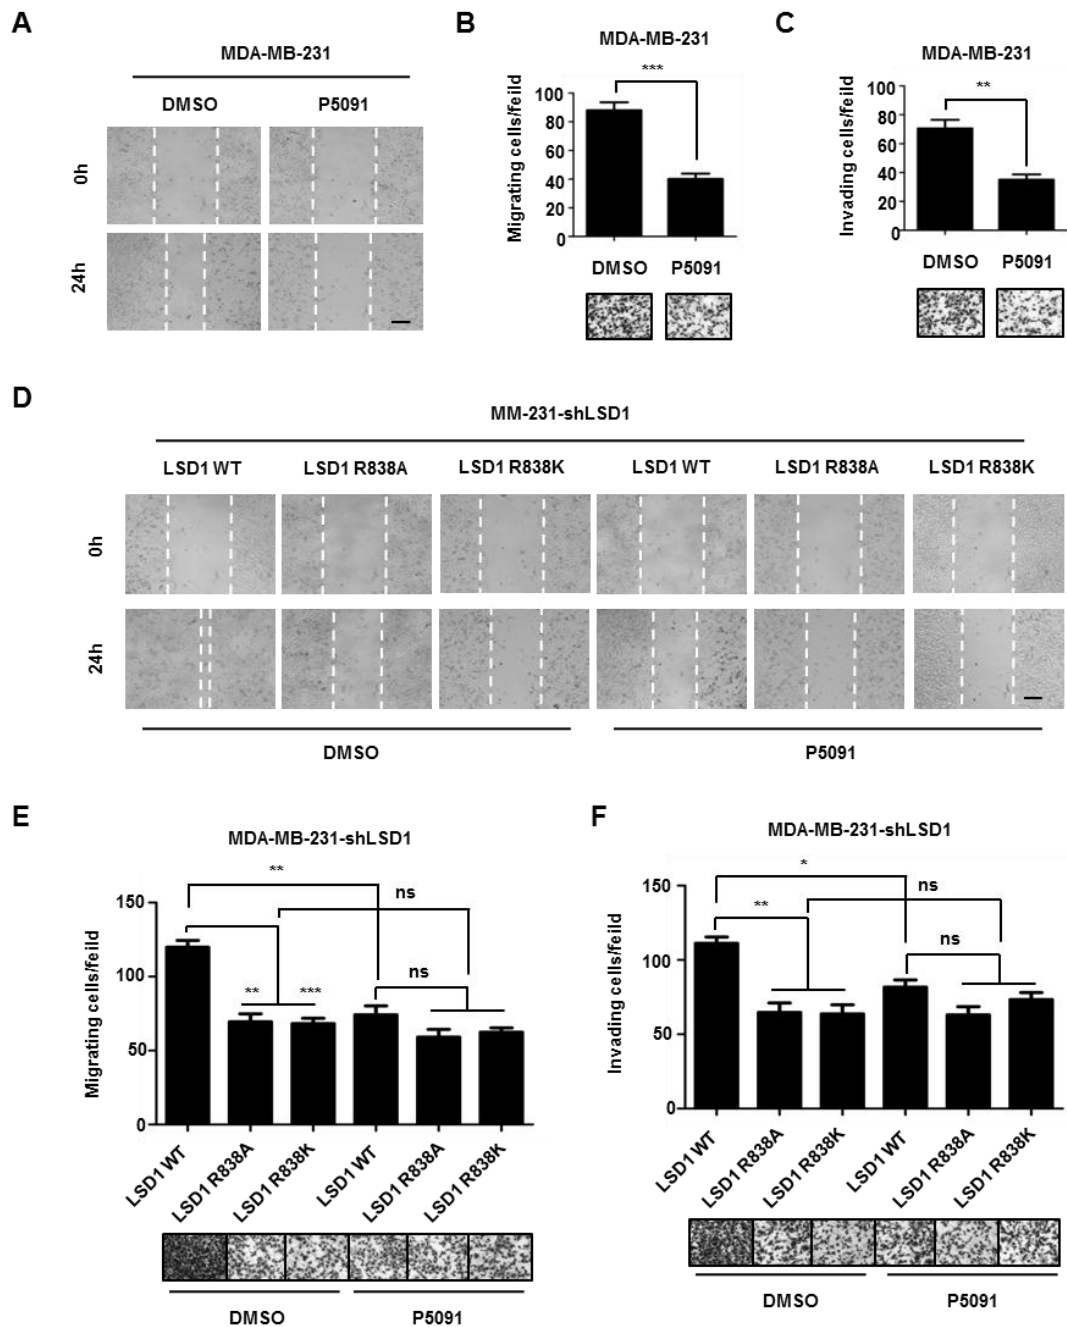

**Appendix Figure S6. USP7 inhibitor attenuates LSD1-induced cell migration and invasion depending on LSD1 R838me2a.** (A) Wound-healing assay of MDA-MB-231 cells treated with DMSO or P5091. The wounds were created by scraping the cells with sterile pipette tip. Scale bars, 100  $\mu$ m. (B, C) Migration (B) and invasion (C) assays of MDA-MB-231 cells treated with DMSO or P5091. Representative images of migrated and invaded cells are

shown. Data represent the number of cells derived from mean cell counts of five fields. **(D)** Wound-healing assay of MM-231-shLSD1-WT/R838A/R838K cells with or without P5091 treatment. The wounds were created by scraping the cells with sterile pipette tip. Scale bars, 100  $\mu$ m. **(E, F)** Migration **(E)** and invasion **(F)** assays of MM-231-shLSD1-WT/R838A/R838K cells treated with DMSO or P5091. Representative images of migrated and invaded cells are shown. Data represent the number of cells derived from mean cell counts of five fields.

Data information: Error bars represent mean  $\pm$  SD, n = 3 experimental replicates, \**P* < 0.05, \*\**P* < 0.01, \*\*\**P* < 0.001, ns = not significant, Student's t-test.

**Appendix Table S1. Detailed ELISA data of Appendix Fig S1A**

| Animal ID     | Blank | (-)<br>1:1000 | SA<br>1:8000 | SA<br>1:16000 | SA<br>1:32000 | SA<br>1:64000 | SA<br>1:128000 |
|---------------|-------|---------------|--------------|---------------|---------------|---------------|----------------|
| RB9301(P-Ab)  | 0.084 | 0.07          | 2.755        | 2.291         | 1.865         | 1.539         | 1.248          |
| RB9302(P-Ab)  | 0.072 | 0.052         | 2.673        | 2.216         | 1.812         | 1.481         | 1.169          |
| RB9301(NP-Ab) | 0.078 | 0.065         | 2.601        | 2.362         | 1.882         | 1.358         | 0.952          |
| RB9302(NP-Ab) | 0.063 | 0.058         | 2.683        | 2.377         | 2.069         | 1.597         | 1.162          |

ELISA:

Coating Antigens: free peptide

Coating Concentration: 2 ug/ml, 100ul / well

Coating Buffer: Phosphate Buffered Saline, pH7.4

Secondary Antibody: Goat Anti-Rabbit IgG (H+L), HRP Conjugated

(-):negative serum                      1:1000                      OD<0.2

SA:Antigen affinity purified Pab

OD 1:32000>1.0                      ELISA titer>1:32000

**Appendix Table S2. Correlation between LSD1R838me2a/LSD1/CARM1 levels and histopathological data in 70 breast cancer specimens**

| TNM Stage  | Case (n) | High-level LSD1R838me2a (n) | High LSD1R838me2a (%) | P-Value       |
|------------|----------|-----------------------------|-----------------------|---------------|
| Stage I/II | 43       | 15                          | 34.9                  | <b>0.0095</b> |
| Stage III  | 27       | 18                          | 66.7                  |               |
| <hr/>      |          |                             |                       |               |
| TNM Stage  | Case (n) | High-level LSD1 (n)         | High LSD1 (%)         | P-Value       |
| Stage I/II | 43       | 14                          | 32.6                  | <b>0.002</b>  |
| Stage III  | 27       | 19                          | 70.4                  |               |
| <hr/>      |          |                             |                       |               |
| TNM Stage  | Case (n) | High-level CARM1 (n)        | High CARM1 (%)        | P-Value       |
| Stage I/II | 42       | 16                          | 38.1                  | <b>0.0027</b> |
| Stage III  | 28       | 21                          | 75                    |               |

N=70. P values are the result of  $\chi^2$  tests.



## Polyclonal antibody production

### Step1: Antigen Preparation

Protein: provide 3mg antigen for immunization at least and 5mg for both ELISA test&Antigen Affinity Purification at least.

Peptide: design & Synthesis.conjugation with KLH.

### Step2: Immunization (10 weeks for high titer,5-6weeks for Fast-titer)

Preparation of 2 Rabbits

Process flow chart:

|                                             | Process                                                           |
|---------------------------------------------|-------------------------------------------------------------------|
| Day0                                        | 1-2ml pre-immune sera and 1 <sup>st</sup> -immunization with CFA  |
| Day14                                       | 2 <sup>nd</sup> -immunization with CFA                            |
| Day28                                       | 3 <sup>rd</sup> -immunizaiton with IFA                            |
| Day35                                       | 4th-immunizaiton with IFA                                         |
| Day42                                       | 5th-immunizaiton with NaCl(0.9%)                                  |
| Day49                                       | 6th-immunizaiton with NaCl(0.9%)                                  |
| Day56                                       | 7th-immunizaiton with NaCl(0.9%) & serum collected for ELISA test |
| Day63                                       | 8th-immunizaiton with NaCl(0.9%)                                  |
| Day70                                       | Bleed                                                             |
| We will provide ELISA data to you by e-mail |                                                                   |

If we get high serum titer (at least 1:8,000 dilution), we will do the followings:

### Step3: Antigen Affinity Purification (1-2 weeks)

At least 3-5mg Antibody by Antigen Affinity Purification.

### Step4: Identification

Elisa test titer >1:32000

**13-15 weeks are needed for all the process in total.**
