# Supplementary material
Source: PubMed Central journal article supplement (PMC7001506)
Supplement: EMBR-21-e48597-s002.pdf [file EMBR-21-e48597-s002.pdf]

**Figure EV1. LSD1 is methylated by and interacts with CARM1.**

- A HEK-293T cells were transfected with Flag-tagged LSD1, and cell lysates were immunoprecipitated by anti-Flag antibody and then subjected to immunoblotting.
- B, C *In vitro* methylation assays. Purified fusion proteins of GST-tagged or Flag-tagged PRMTs were incubated with core histones (B) and GST or GST-LSD1 (C) in the presence of <sup>3</sup>H-SAM. Methylated proteins were detected by autoradiography, and the total amounts of proteins were visualized by Coomassie Blue staining (B, asterisks: PRMTs, filled circles: core histones; C, asterisks: PRMTs, arrows: LSD1, arrowheads: automethylation of CARM1, filled circles: GST).
- D LSD1 asymmetric dimethylation status was examined by IP assay with anti-Flag in HEK-293T cells that transfected with the indicated plasmids.
- E Purified GST-tagged LSD1 was pulled down with the Flag-CARM1 purified from HEK-293T cells. The amounts of GST and GST-tagged LSD1 were visualized by Coomassie Blue staining (asterisks: LSD1).
- F *In vitro* methylation assays. Purified fusion protein of GST-tagged LSD1 WT or its mutants was incubated with GST-CARM1 in the presence of SAM. Methylation of LSD1 protein was analyzed by Western blot.

Source data are available online for this figure.

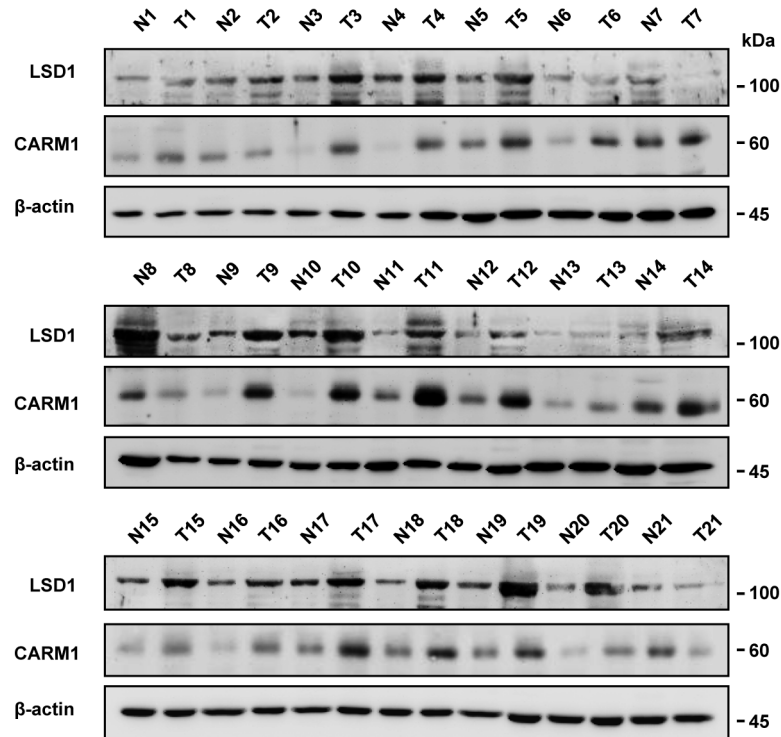

**Figure EV2. CARM1 and LSD1 are highly expressed in human breast cancerous tissues and positively correlated with each other.**

Immunoblotting analysis of LSD1 and CARM1 expression in human breast cancerous tissues and adjacent tissues (*n* = 21). N, normal; T, tumor.

Source data are available online for this figure.

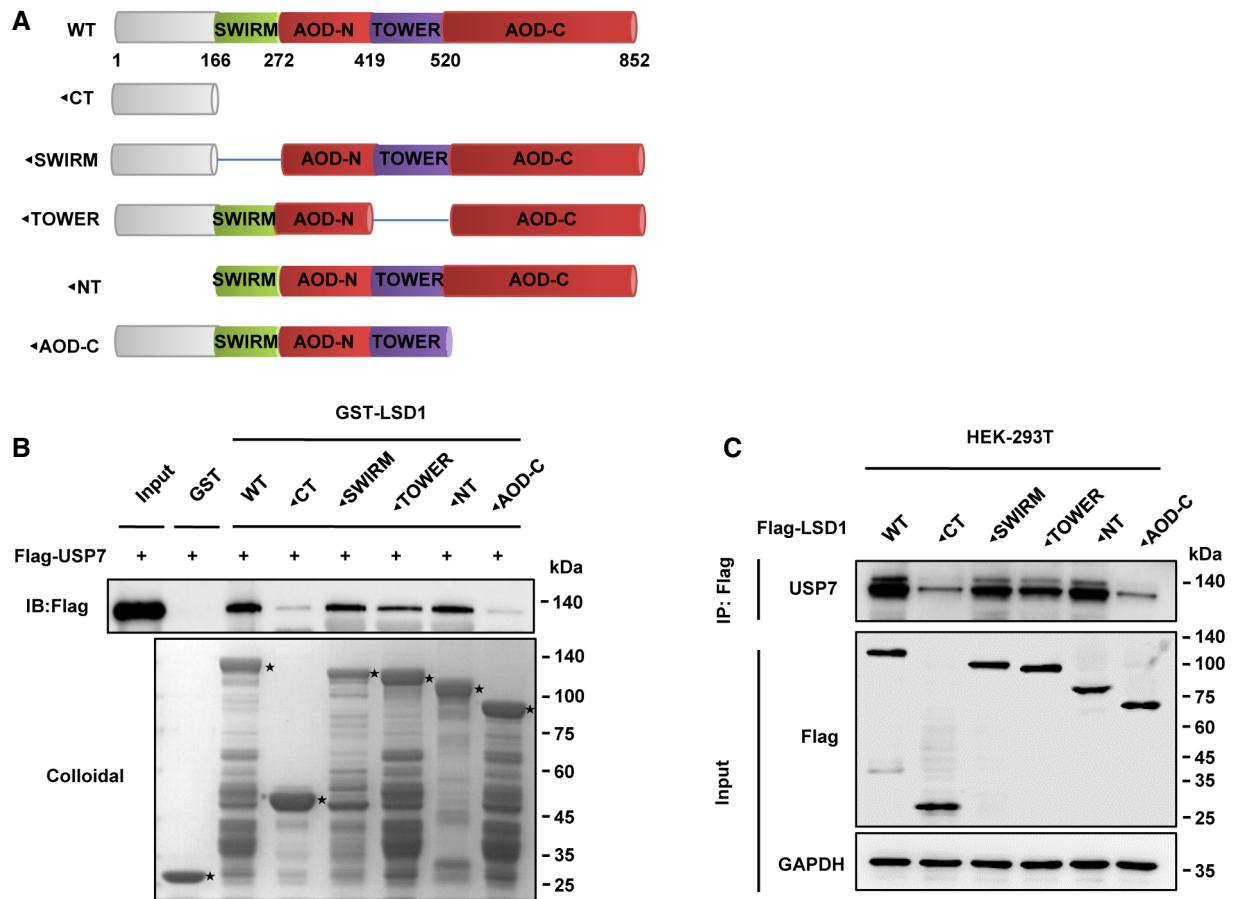

**Figure EV3. Carboxyl AOD domain (AOD-C) of LSD1 is important for its interaction with USP7.**

A Schematic diagram of LSD1. LSD1 encodes a polypeptide of 852 aas with a SWIRM domain, a TOWER domain in between the amino amine oxidase (AOD) domain (AOD-N) and carboxyl AOD domain (AOD-C). NT amino terminus; CT carboxyl terminus.

B The GST-tagged LSD1 deletion mutants were applied for GST pull-down assays with Flag-USP7 purified from HEK-293T cells. The amounts of GST or GST-tagged mutants were visualized by Coomassie Blue staining (asterisk: GST or GST-LSD1 mutants).

C Flag-tagged LSD1 deletion mutants were overexpressed in HEK-293T cells, followed by Co-IP assays using anti-Flag antibody, and their interaction with USP7 was assessed by Western blot.

Source data are available online for this figure.

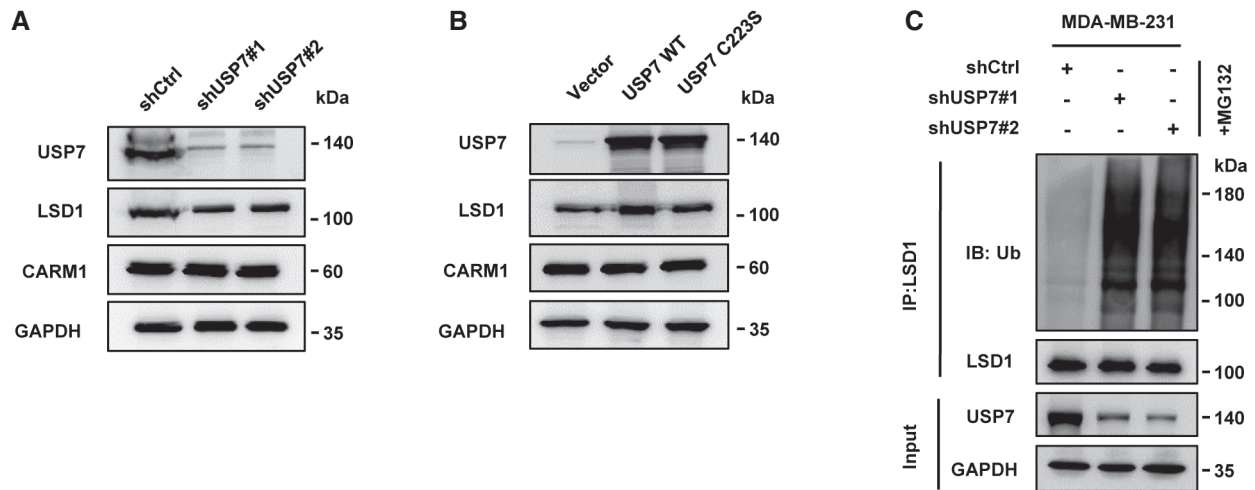

**Figure EV4. Ubiquitin-specific protease 7 increases LSD1 protein level.**

A MDA-MB-231 cells were transfected with USP7 shRNAs or control vector, and LSD1 protein level was assessed by Immunoblotting.  
 B HEK-293T cells were transfected with USP7 WT or USP7 C223S, and LSD1 protein level was assessed by immunoblotting.  
 C MDA-MB-231 cells were transfected with USP7 shRNAs or control vector, and cell lysates were immunoprecipitated by anti-LSD1 antibody and then subjected to immunoblotting.

Source data are available online for this figure.

**Figure EV5. Methylation of LSD1 promotes migration and invasion of MDA-MB-231, MCF7, and MCF10A cells.**

A, B Wound-healing assay of MM-231-shLSD1-WT/R838A/R838K/R838F cells (A) and MCF7-LSD1-WT/R838A/R838K/R838F cells (B) with or without MS049 treatment. The wounds were created by scraping the cells with sterile pipette tip. Scale bars, 100  $\mu$ m.  
 C, D Migration (C) and invasion assays (D) were conducted in MCF10A cells that co-expressed CARM1 with LSD1 WT, or one of LSD1 mutants (R838A/R838K/R838F). Representative images of migrated and invaded cells are shown. Data represent the number of cells derived from mean cell counts of five fields (Error bars represent mean  $\pm$  SD,  $n = 3$  experimental replicates, \* $P < 0.05$ , \*\* $P < 0.01$ , \*\*\* $P < 0.001$ , ns = not significant, Student's  $t$ -test).  
 E Wound-healing assays of MCF10A cells that co-expressed CARM1 with LSD1 WT, or one of LSD1 mutants (R838A/R838K/R838F). The wounds were created by scraping the cells with sterile pipette tip. Scale bars, 100  $\mu$ m.

Source data are available online for this figure.

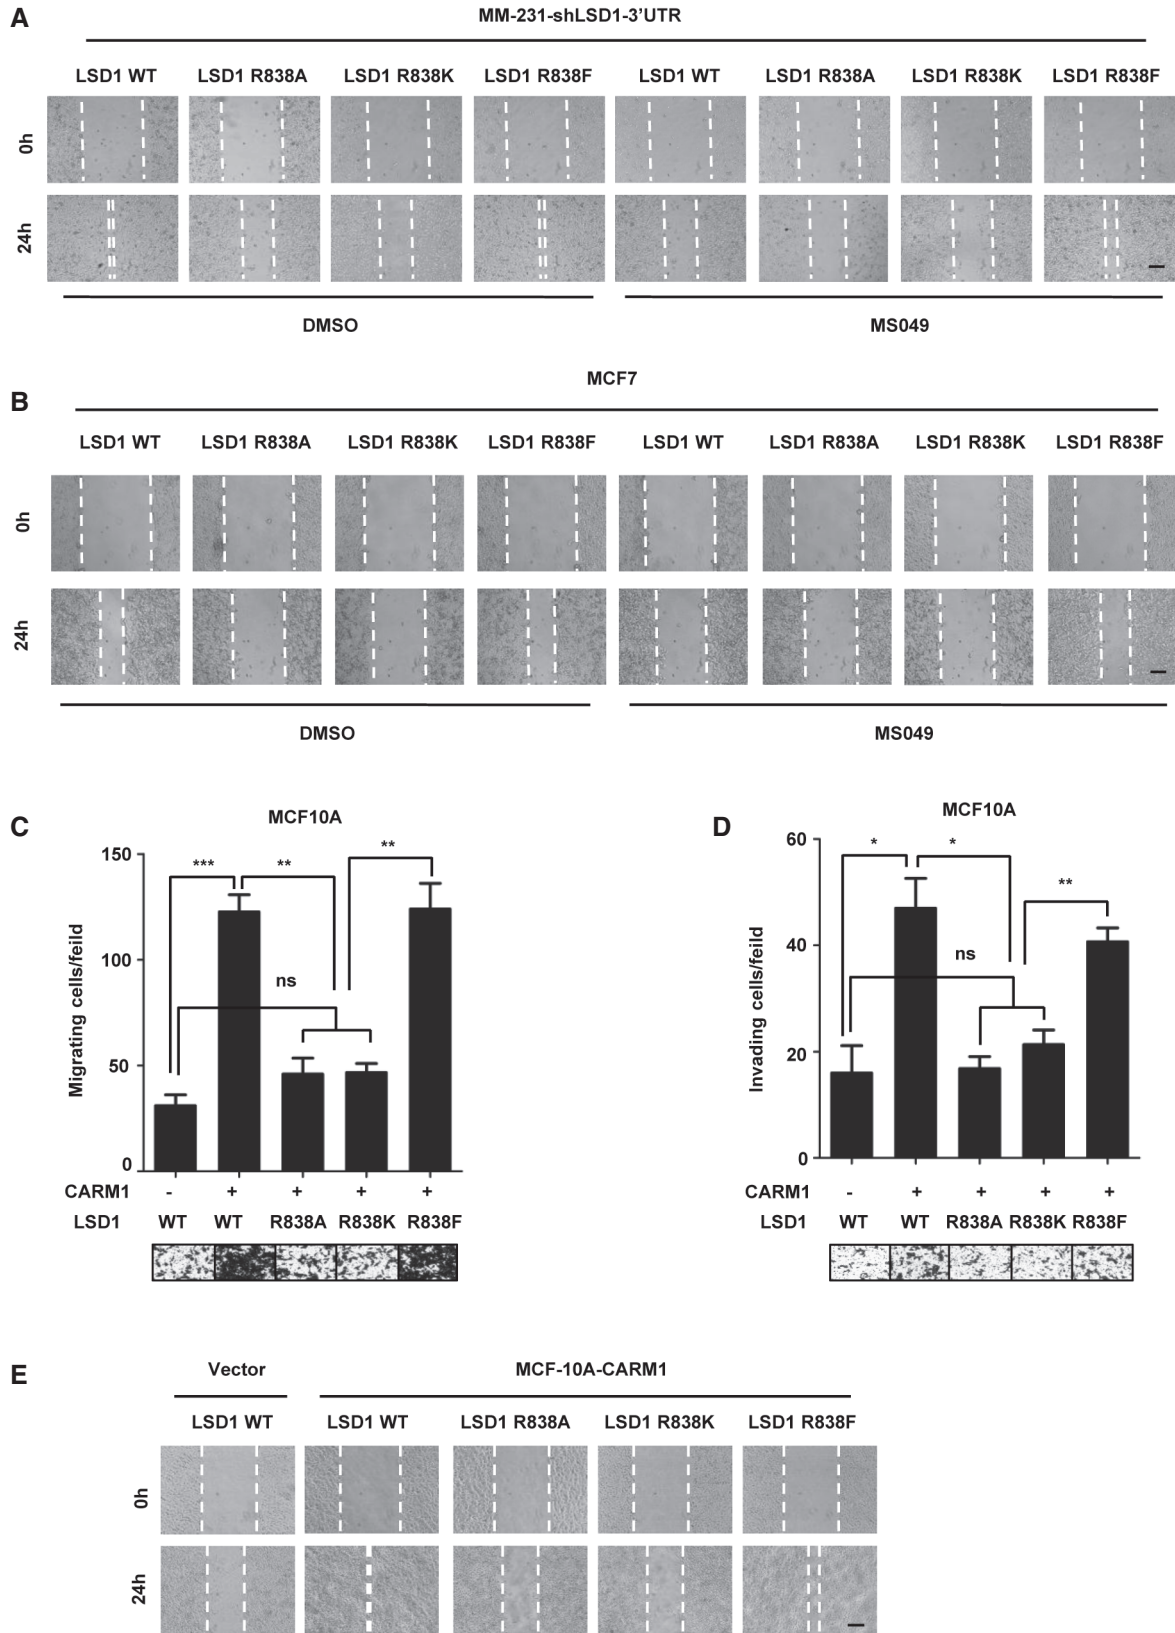

Figure EV5.
